# Supplementary material
Source: PubMed Central journal article supplement (PMC4744811)
Supplement: NIHMS710708-supplement-supplement_1.pdf [file NIHMS710708-supplement-supplement_1.pdf]

## Supplemental Material

**A. Changes in UPDRS Total scores and in TrkB signaling components (week-4 MIRT - preMIRT)**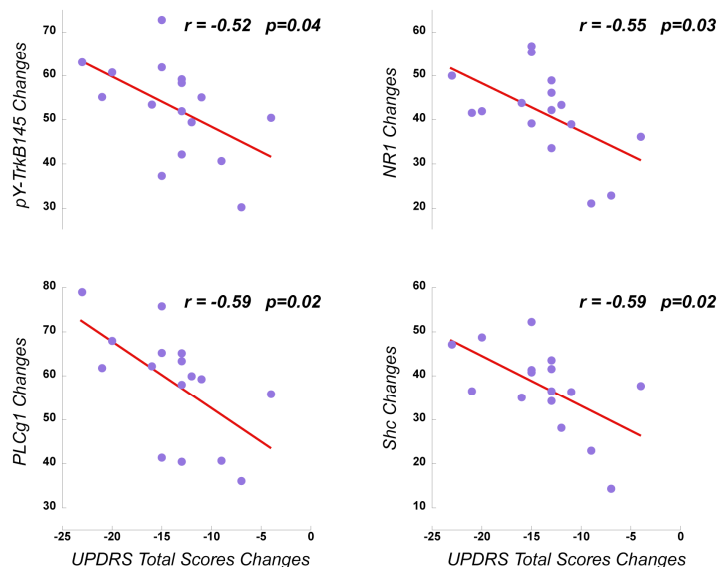**B. Changes in UPDRSII scores and in TrkB signaling components (week-4 MIRT - preMIRT)**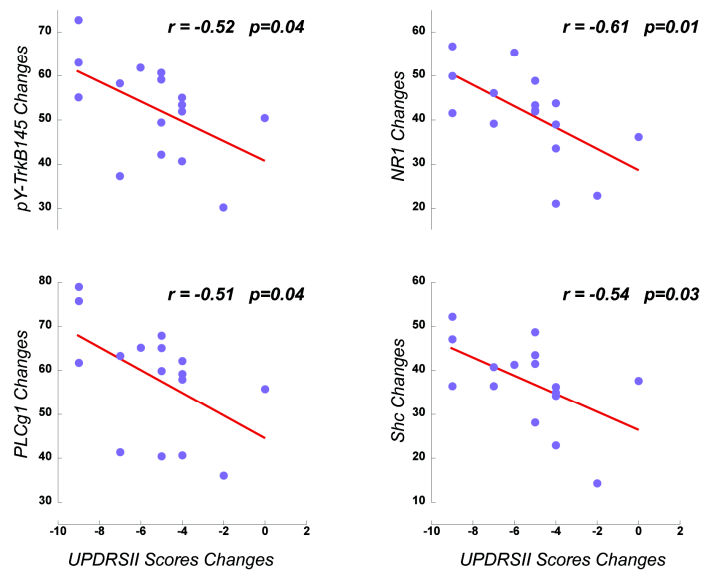

FIGURE 1. Correlations between UPDRS scores decreases and the increases in BDNF-TrkB signaling components at the end of the 4-week MIRT (i.e., [4-week MIRT]-[pre-MIRT]). A decrease in UPDRS scores indicates clinical improvement. Notice that we found negative correlations that is, the greater the decrease in UPDRS scores, the higher the enhancement

of BDNF-TrkB signaling. We did not find significant correlations with TrkB 95KDa and downstream components of the cascade (pT/pY-ERK2, PS-Akt1).
